# Supplementary material for: Effect of Land Reclamation on Soil Properties, Mineralogy and Trace-Element Distribution and Availability: The Example of Technosols Developed on the Tailing Disposal Site of an Abandoned Zn and Pb Mine
Source: MDPI journal article supplement (doi:10.3390/min11060559), 2021-05-24
Supplement: s1 [file s1]

Supplementary materials for the paper:

# Effect of land reclamation on soil properties, mineralogy and trace element distribution and availability: the example of Technosols developed on mine tailing disposal site of the abandoned Zn and Pb mine

Magdalena Tarnawczyk, Łukasz Uzarowicz, Katarzyna Perkowska-Pióro, Artur Pędziwiatr and Wojciech Kwasowski

**Table S1.** AAS operating conditions used for Thermo Fisher iCE 3000 apparatus.

| Parameter <sup>†</sup> | As         | Pb         | Cd         | Zn         |
|------------------------|------------|------------|------------|------------|
| Wavelength (nm)        | 193.7      | 217        | 228.8      | 213.9      |
| Background correction  | Zeeman     | Deuterium  | Deuterium  | Deuterium  |
| Lamp current (mA)      | 12         | 15         | 10         | 10         |
| Slit width (nm)        | 0.2 or 0.5 | 0.2 or 0.5 | 0.2 or 0.5 | 0.2 or 0.5 |

<sup>†</sup>Sample flow rate is 4 mL/min. The following parameters were adjusted and optimized each time for different chemical matrices: fuel flow; signal mode; signal type; height of gas burner; matrix modifier; temperature and time of mineralization and atomization; injection volume.

**Table S2.** Determination results of the certified reference material SS-2 Contaminated Soil by means of the AAS.

|                                            | As    | Cd      | Pb      | Zn      |
|--------------------------------------------|-------|---------|---------|---------|
| Certified value (mg·kg <sup>-1</sup> )     | 75    | 2.0     | 126     | 467     |
| Confidence Interval (mg·kg <sup>-1</sup> ) | 65–85 | nd      | 116–136 | 444–490 |
| Analysed value (mg·kg <sup>-1</sup> )      | 78    | 2.2     | 136     | 450     |
| Confidence Interval (mg·kg <sup>-1</sup> ) | 68–88 | 2.0–2.5 | 130–146 | 440–470 |

nd – not determined.

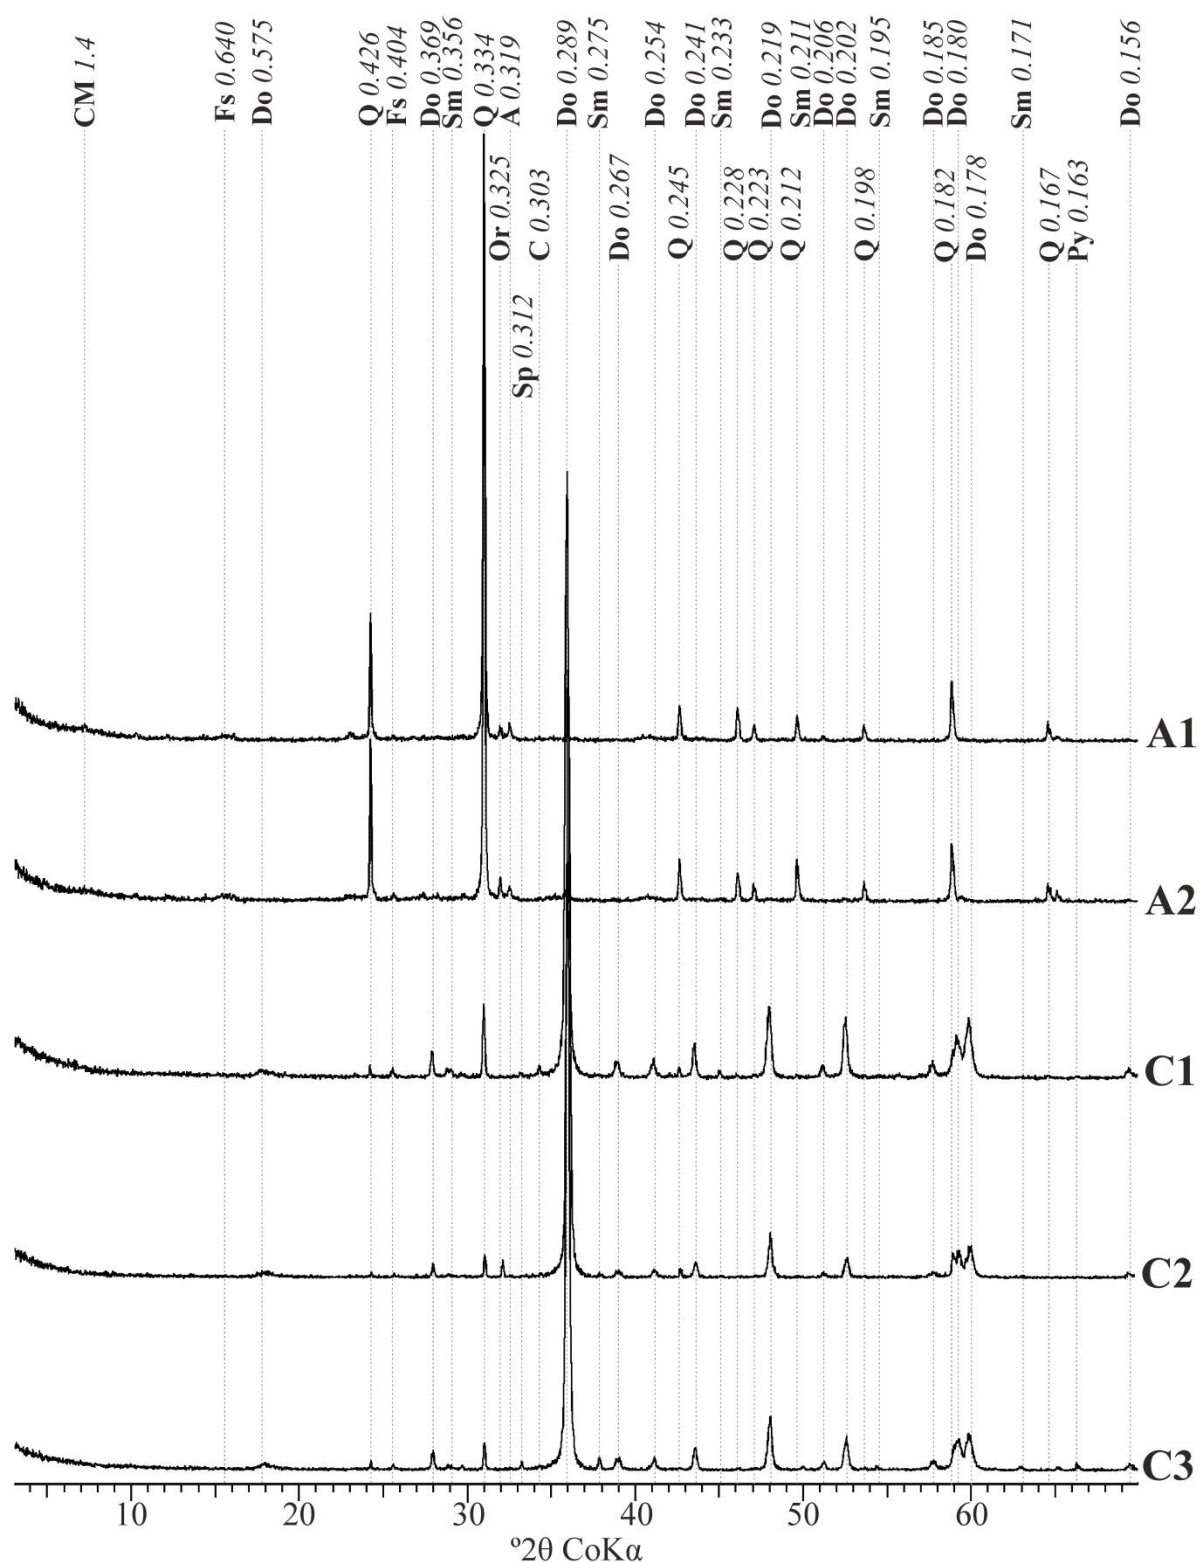

**Figure S1.** Mineral composition of profile TR1. The  $d$  values (in italics) are in nm. Mineral symbols: A – albite, C – calcite, CM – clay minerals, Do – dolomite, Fs – feldspars (undivided), Or – orthoclase, Py – pyrite, Q – quartz, m – smithsonite, Sp – sphalerite.

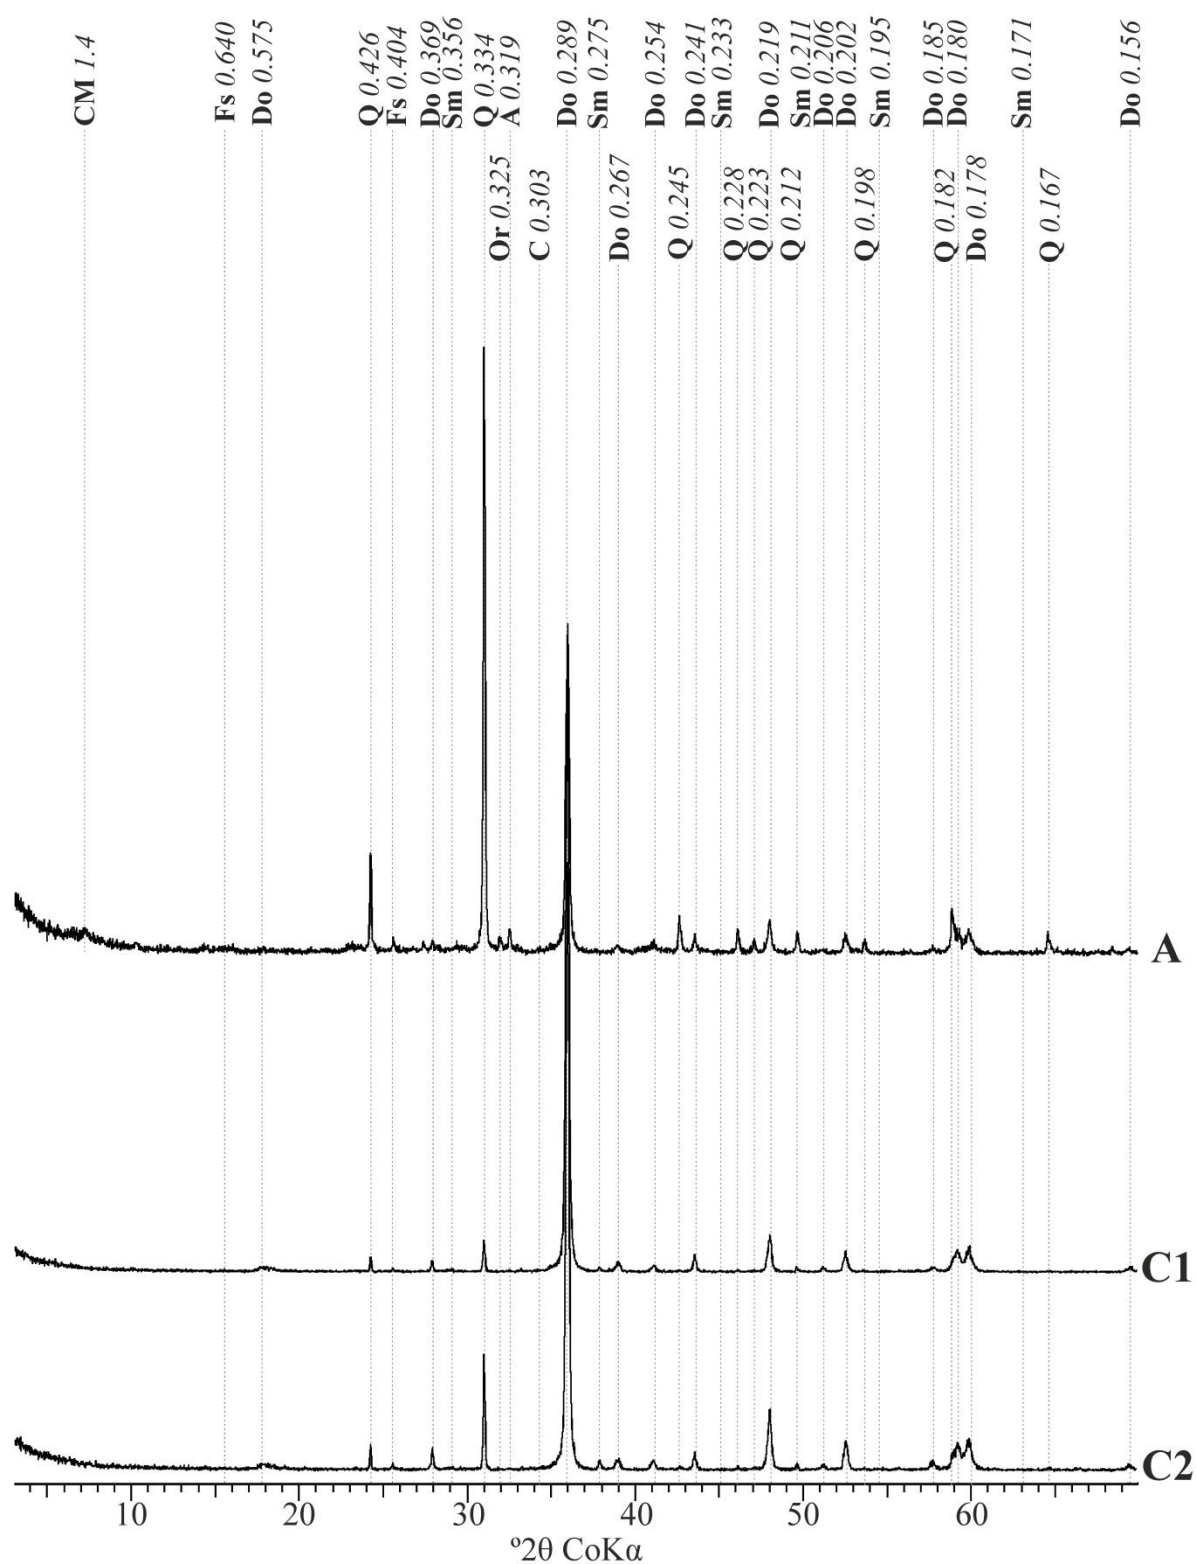

**Figure S2.** Mineral composition of profile TR2. The *d* values (in *italics*) are in nm. Mineral symbols: A – albite, C – calcite, CM – clay minerals, Do – dolomite, Fs – feldspars (undivided), Or – orthoclase, Q – quartz, Sm – smithsonite.

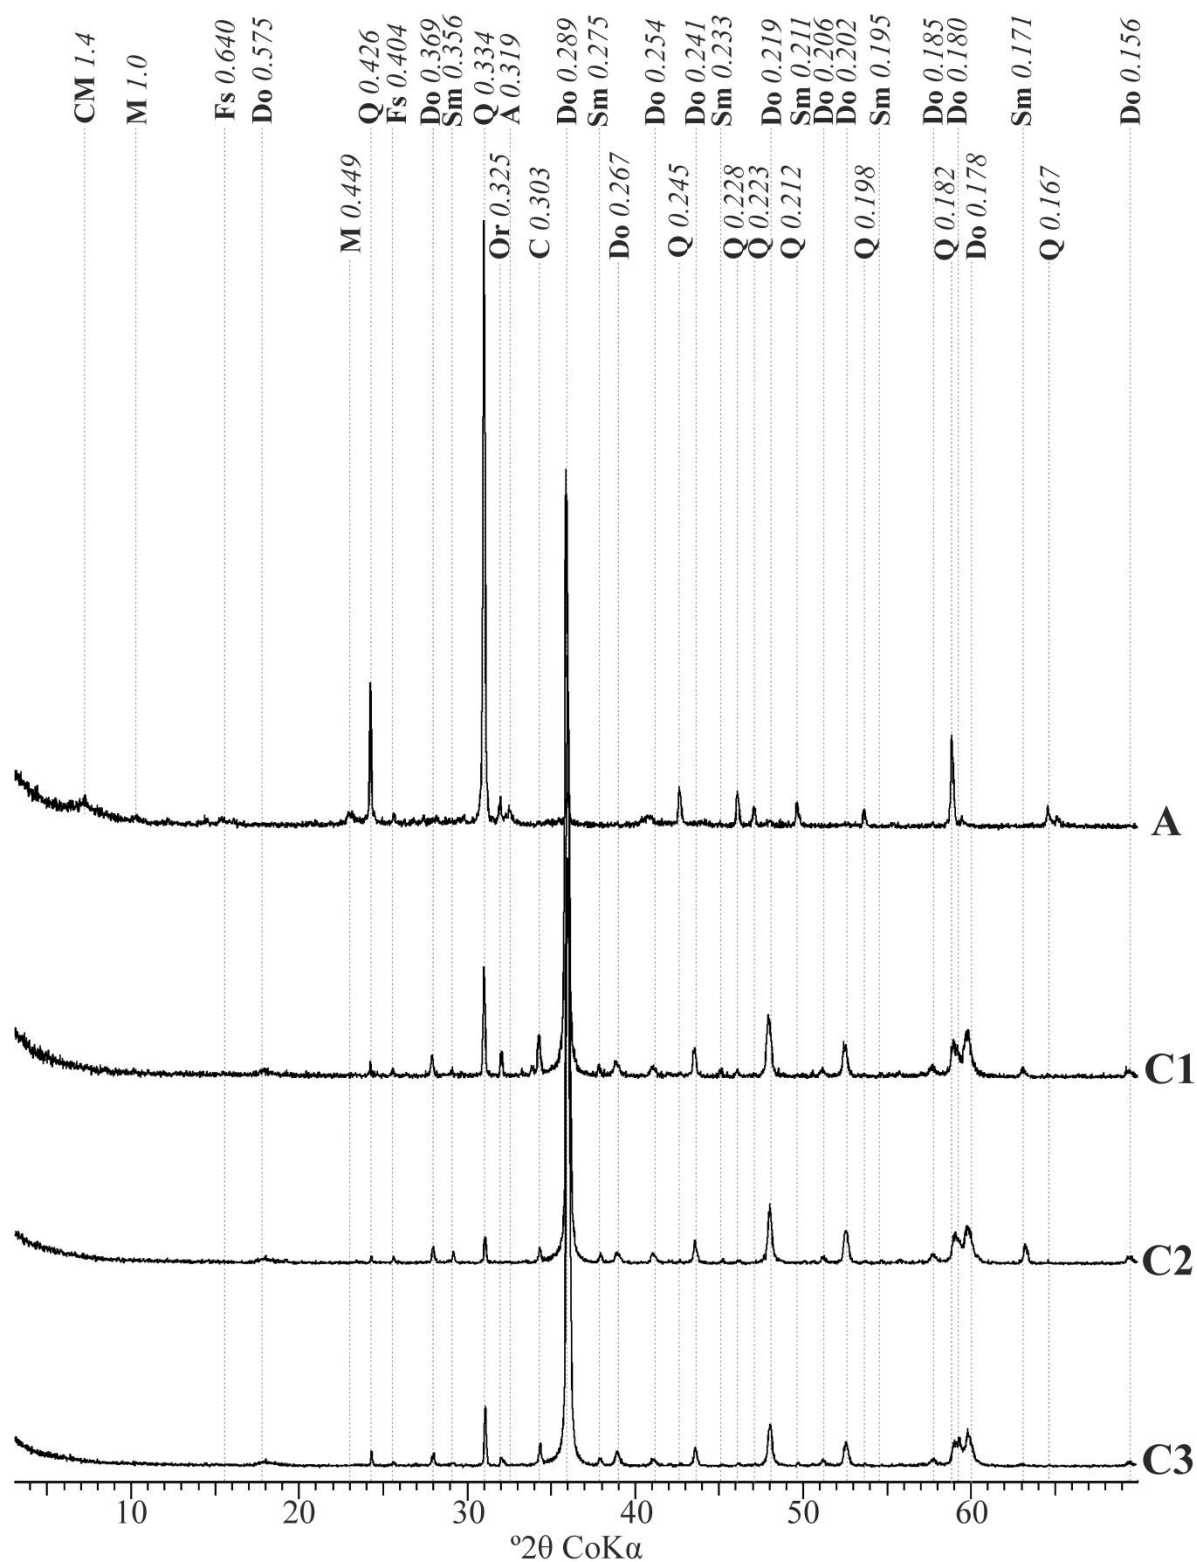

**Figure S3.** Mineral composition of profile TR3. The *d* values (in *italics*) are in nm. Mineral symbols: A – albite, C – calcite, CM – clay minerals, Do – dolomite, Fs – feldspars (undivided), M – mica, Or – orthoclase, Q – quartz, Sm – smithsonite.
